# Supplementary material for: Effect of Oat β-Glucan on Affective and Physical Feeling States in Healthy Adults: Evidence for Reduced Headache, Fatigue, Anxiety and Limb/Joint Pains
Source: Nutrients. 2021 May 1;13(5):1534. doi: 10.3390/nu13051534 (PMC8147290; doi:10.3390/nu13051534)
Supplement: Supplementary file 1 [file nutrients-13-01534-s001.zip › nutrients-1160800-supplementary.pdf]

**Inclusion criteria**

- fasting calculated LDL cholesterol between 3.00 and 5.00 mmol/L, inclusive
- males and non-pregnant, non-lactating females aged 18-65 yr inclusive
- willing and able to give informed consent
- agree to consume the investigational product three times daily for the duration of the study
- BMI of 18.5 to <40.0 kg/m<sup>2</sup> (65-75%, or n=135-155 with a BMI<30; 12-25% or n=25-50 with a BMI 30.00-34.99; and 2-12% or n=5-25 with a BMI 35.00-39.99).
- Blood pressure <160/100 mmHg
- fasting triglycerides <4.0 mmol/L
- fasting serum glucose <126mg/dL (<7 mmol/L)
- serum urea and creatinine < 1.8 times upper limit of normal (ULN) unless approved by the qualified investigator (QI)
- serum aspartate aminotransaminase (AST), alanine aminotransferase (ALT) and gamma-glutamyl transferase (GGT) < 2 times ULN unless approved by QI
- hemoglobin > 0.9 times lower limit of normal and < 1.1 times ULN unless approved by QI
- willing to refrain from consumption of oat products, barley products and psyllium husk products during the intervention period
- willing to maintain their habitual diet
- have a stable body weight (<7 kg change) over the past 3 mo, and
- maintain current level of physical activity, habitual diet and body weight throughout the trial
- absence of health conditions that would prevent fulfillment of study requirements as judged by the Investigator on the basis of medical history
- understanding the study procedures and willing to provide informed consent to participate in the study and authorization to release relevant protected health information to the study investigator

**Exclusion criteria**

- failure to meet any one of the inclusion criteria
- participation in any PepsiCo trial within 6 mo of randomization
- participation in any clinical trial within 30 d of participation
- pregnancy, breastfeeding or planning to be pregnant
- allergy or sensitivity to study product ingredients
- dislike description of study product
- diet containing  $\geq 15\%$  of energy from saturated fat
- consuming >14 g fiber/1000 Kcal (including soluble fiber supplements)
- consumption of more than 2 drinks/d of alcohol, or more than 14 drinks/wk
- eating at unusual times in the opinion of the dietitian/nutritionist
- extreme dietary habits (i.e. Atkins diet, very high protein diets, etc.) in the opinion of the dietitian/nutritionist
- smoking >5 cigarettes per day, (no more than 15.5% of total smokers per arm)
- vaping (vaporizers, e-cigarettes, etc.); smokeless tobacco, and nicotine patch or gum use
- use of cholesterol lowering medication or prescription drug for treating diabetes mellitus within 4 wk of randomization
- active major gastrointestinal disorder
- travel outside of Canada / USA within 2 wk of screening; travel away from home for more than 3 consecutive nights during the study period
- major trauma or hospitalization for a medical condition or major surgical event within 6 mo of randomization
- history of cancer within two yr of randomization, except for non-melanoma skin cancer

Title: Effect of oat  $\beta$ -glucan on affective and physical feeling states in healthy adults: evidence for reduced headache, fatigue, anxiety and limb/joint pains

- any condition or substance use which might, in the opinion of the PI, make participation dangerous for the participant, lead to poor attendance or compliance or affect the results

### Withdrawal criteria

- Withdrawal of consent for any reason
- Less than 90% compliance (38/42 sachets every 2 wk) with test product consumption based on sachet count, failure to avoid consumption of oat products or other  $\beta$ -glucan rich products such as barley and psyllium to a maximum of 3 servings/wk, or to maintain their habitual (low fat and low fiber) diet, in the opinion of the study staff
- During the course of the study, the development of an injury or illness or initiation of use of a medication which, in the opinion of Dr. Wolever, makes the subject's continued participation dangerous to the subject or to others, or which may affect the results.
- Failure to follow INQUIS safety guidelines
- Repeated failure to attend at scheduled visits
- Repeated failure to follow the protocol

Table S1: Nutritional composition of intervention products (per sachet)

|                         | Active Intervention                                                        | Control Intervention                                                                                                                                                                                                                                                        |
|-------------------------|----------------------------------------------------------------------------|-----------------------------------------------------------------------------------------------------------------------------------------------------------------------------------------------------------------------------------------------------------------------------|
| Weight (g)              | 21.0                                                                       | 20.2                                                                                                                                                                                                                                                                        |
| Energy (kcal)           | 77                                                                         | 74                                                                                                                                                                                                                                                                          |
| Total fat (g)           | 0.9                                                                        | 0.9                                                                                                                                                                                                                                                                         |
| Saturated fat (g)       | 0.0                                                                        | 0.0                                                                                                                                                                                                                                                                         |
| Total carbohydrate (g)  | 15.4                                                                       | 16.4                                                                                                                                                                                                                                                                        |
| Total sugars (g)        | 9.3                                                                        | 8.7                                                                                                                                                                                                                                                                         |
| Added sugars (g)        | 9.0                                                                        | 8.5                                                                                                                                                                                                                                                                         |
| Starch (g)              | 4.2                                                                        | 5.4                                                                                                                                                                                                                                                                         |
| Total fiber (g)         | 1.9                                                                        | 0.3                                                                                                                                                                                                                                                                         |
| Sugar Alcohol (g)       | 0.0                                                                        | 2.1                                                                                                                                                                                                                                                                         |
| Avail. Carbohydrate (g) | 13.5                                                                       | 14.1                                                                                                                                                                                                                                                                        |
| B-glucan (g)            | 1.0                                                                        | 0.0                                                                                                                                                                                                                                                                         |
| Protein (g)             | 1.9                                                                        | 1.9                                                                                                                                                                                                                                                                         |
| Ingredients:            | Hydrolyzed Oat Bran, sugar, maltodextrin, silicon dioxide, natural flavor. | Sugar, hydrolyzed brown rice flour, erythritol, pea protein concentrate, powdered shortening (high oleic sunflower oil, maltodextrin, food starch modified, sodium silicoaluminate, mixed tocopherols), cellulose gum, silicon dioxide, natural flavors, mixed tocopherols. |

Table S2: Occurrence of 8 of the 16 non-gastro-intestinal symptoms on the symptoms questionnaire.

| Symptom                  | Visit    | Control (n=95) |      |     |        | Test(n=96) |      |     |        |
|--------------------------|----------|----------------|------|-----|--------|------------|------|-----|--------|
|                          |          | None           | Mild | Mod | Severe | None       | Mild | Mod | Severe |
| Headache                 | Screen 2 | 69             | 20   | 5   | 1      | 73         | 21   | 2   | 0      |
|                          | Baseline | 72             | 18   | 4   | 1      | 76         | 15   | 5   | 0      |
|                          | Week 2   | 65             | 18   | 11  | 1      | 75         | 17   | 4   | 0      |
|                          | Week 4   | 67             | 23   | 4   | 1      | 77         | 13   | 5   | 1      |
| Fatigue                  | Screen 2 | 61             | 26   | 7   | 1      | 56         | 38   | 2   | 0      |
|                          | Baseline | 67             | 26   | 2   | 0      | 57         | 35   | 4   | 0      |
|                          | Week 2   | 65             | 27   | 3   | 0      | 64         | 29   | 2   | 1      |
|                          | Week 4   | 65             | 29   | 1   | 0      | 71         | 22   | 2   | 1      |
| Feelings of anxiety      | Screen 2 | 76             | 15   | 4   | 0      | 70         | 26   | 0   | 0      |
|                          | Baseline | 76             | 18   | 1   | 0      | 77         | 17   | 2   | 0      |
|                          | Week 2   | 79             | 13   | 3   | 0      | 81         | 13   | 2   | 0      |
|                          | Week 4   | 79             | 15   | 1   | 0      | 83         | 11   | 2   | 0      |
| Pains in joints or limbs | Screen 2 | 65             | 21   | 7   | 2      | 66         | 24   | 5   | 1      |
|                          | Baseline | 73             | 17   | 3   | 2      | 74         | 21   | 1   | 0      |
|                          | Week 2   | 74             | 11   | 7   | 3      | 74         | 20   | 2   | 0      |
|                          | Week 4   | 69             | 18   | 6   | 2      | 73         | 21   | 2   | 0      |
| Tend to become exhausted | Screen 2 | 72             | 16   | 7   | 0      | 76         | 20   | 0   | 0      |
|                          | Baseline | 77             | 17   | 1   | 0      | 79         | 16   | 1   | 0      |
|                          | Week 2   | 82             | 10   | 3   | 0      | 89         | 6    | 1   | 0      |
|                          | Week 4   | 81             | 14   | 0   | 0      | 84         | 11   | 1   | 0      |
| Lack of energy           | Screen 2 | 67             | 20   | 8   | 0      | 59         | 36   | 1   | 0      |
|                          | Baseline | 72             | 19   | 4   | 0      | 72         | 20   | 4   | 0      |
|                          | Week 2   | 75             | 18   | 1   | 1      | 78         | 16   | 1   | 1      |
|                          | Week 4   | 76             | 17   | 2   | 0      | 79         | 14   | 2   | 1      |
| Lack of appetite         | Screen 2 | 84             | 10   | 1   | 0      | 89         | 7    | 0   | 0      |
|                          | Baseline | 85             | 9    | 1   | 0      | 88         | 8    | 0   | 0      |
|                          | Week 2   | 77             | 17   | 1   | 0      | 87         | 7    | 1   | 1      |
|                          | Week 4   | 82             | 12   | 1   | 0      | 85         | 9    | 1   | 1      |
| Increased appetite       | Screen 2 | 85             | 9    | 1   | 0      | 87         | 7    | 2   | 0      |
|                          | Baseline | 90             | 4    | 1   | 0      | 89         | 6    | 1   | 0      |
|                          | Week 2   | 85             | 10   | 0   | 0      | 89         | 7    | 0   | 0      |
|                          | Week 4   | 89             | 6    | 0   | 0      | 92         | 4    | 0   | 0      |

Values are numbers of participants with no symptom (None), or rating the symptom as Mild, Moderate (Mod) or Severe.

Table S3: Occurrence of the remaining 8 of the 16 non-gastro-intestinal symptoms on the symptoms questionnaire.

| Symptom                                 | Visit    | Control (n=95) |      |     |        | Test(n=96) |      |     |        |
|-----------------------------------------|----------|----------------|------|-----|--------|------------|------|-----|--------|
|                                         |          | None           | Mild | Mod | Severe | None       | Mild | Mod | Severe |
| Palpitation / Throbbing of heart        | Screen 2 | 89             | 4    | 2   | 0      | 90         | 6    | 0   | 0      |
|                                         | Baseline | 89             | 6    | 0   | 0      | 94         | 2    | 0   | 0      |
|                                         | Week 2   | 87             | 7    | 1   | 0      | 92         | 4    | 0   | 0      |
|                                         | Week 4   | 91             | 3    | 1   | 0      | 92         | 4    | 0   | 0      |
| Diminished ability to concentrate       | Screen 2 | 80             | 14   | 1   | 0      | 80         | 16   | 0   | 0      |
|                                         | Baseline | 82             | 13   | 0   | 0      | 89         | 6    | 1   | 0      |
|                                         | Week 2   | 85             | 10   | 0   | 0      | 89         | 6    | 1   | 0      |
|                                         | Week 4   | 84             | 10   | 1   | 0      | 89         | 7    | 0   | 0      |
| Balance disturbances                    | Screen 2 | 90             | 4    | 1   | 0      | 94         | 1    | 1   | 0      |
|                                         | Baseline | 91             | 4    | 0   | 0      | 91         | 5    | 0   | 0      |
|                                         | Week 2   | 92             | 3    | 0   | 0      | 93         | 2    | 1   | 0      |
|                                         | Week 4   | 91             | 4    | 0   | 0      | 91         | 5    | 0   | 0      |
| Feeling cold                            | Screen 2 | 79             | 14   | 2   | 0      | 78         | 17   | 1   | 0      |
|                                         | Baseline | 81             | 13   | 1   | 0      | 81         | 14   | 1   | 0      |
|                                         | Week 2   | 86             | 8    | 1   | 0      | 84         | 11   | 1   | 0      |
|                                         | Week 4   | 82             | 13   | 0   | 0      | 90         | 6    | 0   | 0      |
| Hot flashes / sensation of rising heat  | Screen 2 | 75             | 15   | 4   | 1      | 79         | 11   | 6   | 0      |
|                                         | Baseline | 80             | 12   | 2   | 1      | 76         | 15   | 4   | 1      |
|                                         | Week 2   | 79             | 11   | 4   | 1      | 79         | 12   | 5   | 0      |
|                                         | Week 4   | 79             | 13   | 2   | 1      | 81         | 13   | 2   | 0      |
| Gloomy thoughts                         | Screen 2 | 81             | 13   | 1   | 0      | 83         | 12   | 1   | 0      |
|                                         | Baseline | 89             | 6    | 0   | 0      | 86         | 9    | 1   | 0      |
|                                         | Week 2   | 85             | 10   | 0   | 0      | 88         | 7    | 1   | 0      |
|                                         | Week 4   | 88             | 6    | 1   | 0      | 88         | 6    | 2   | 0      |
| Inner tension                           | Screen 2 | 78             | 15   | 2   | 0      | 76         | 19   | 1   | 0      |
|                                         | Baseline | 88             | 6    | 1   | 0      | 84         | 10   | 1   | 1      |
|                                         | Week 2   | 88             | 6    | 1   | 0      | 87         | 9    | 0   | 0      |
|                                         | Week 4   | 87             | 8    | 0   | 0      | 86         | 8    | 2   | 0      |
| Numbness / burning / itching hands feet | Screen 2 | 88             | 7    | 0   | 0      | 87         | 8    | 1   | 0      |
|                                         | Baseline | 88             | 7    | 0   | 0      | 88         | 7    | 1   | 0      |
|                                         | Week 2   | 91             | 4    | 0   | 0      | 92         | 4    | 0   | 0      |
|                                         | Week 4   | 90             | 5    | 0   | 0      | 91         | 5    | 0   | 0      |

Values are numbers of participants with no symptom (None), or rating the symptom as Mild, Moderate (Mod) or Severe.

Table S4: Effect of sex, age and BMI on symptoms at Baseline.

| Symptom                        | Endpoint | Sex <sup>1</sup> |      | Age <sup>2</sup> |      |           |        | BMI <sup>3</sup> |      |      |           |       |
|--------------------------------|----------|------------------|------|------------------|------|-----------|--------|------------------|------|------|-----------|-------|
|                                |          | F                | M    | Young            | Old  | Mean (SD) |        | Lean             | OW   | OB   | Mean (SD) |       |
|                                |          | (119)            | (72) | (107)            | (84) | None      | Any    | (60)             | (71) | (60) | None      | Any   |
| Headache                       | Presence | 27               | 17   | 20               | 25   | 47.7      | 47.2   | 22               | 24   | 23   | 28.0      | 28.2  |
|                                | Mod/Sev  | 28               | 8    | 18               | 26   | (11.5)    | (11.4) | 25               | 18   | 36   | (4.6)     | (5.0) |
| Fatigue                        | Presence | 40               | 25   | 25               | 42   | 46.1      | 50.6   | 33               | 32   | 38   | 28.0      | 28.0  |
|                                | Mod/Sev  | 13               | 0    | 11               | 5    | (11.5)    | (10.8) | 10               | 4    | 13   | (4.7)     | (4.7) |
| Limb/Joint Pain                | Presence | 29               | 11   | 11               | 32   | 46.3      | 52.3   | 17               | 20   | 32   | 27.9      | 29.1  |
|                                | Mod/Sev  | 14               | 13   | 11               | 15   | (11.5)    | (9.8)  | 0                | 0    | 32   | (4.7)     | (4.8) |
| Anxiety                        | Presence | 24               | 14   | 20               | 21   | 47.8      | 46.9   | 23               | 17   | 22   | 28.0      | 28.0  |
|                                | Mod/Sev  | 7                | 10   | 12               | 5    | (11.3)    | (11.9) | 0                | 0    | 5    | (4.5)     | (5.1) |
| Lack of Energy                 | Presence | 27               | 19   | 23               | 25   | 47.5      | 48.0   | 18               | 23   | 32   | 27.7      | 28.9  |
|                                | Mod/Sev  | 25               | 0    | 11               | 22   | (11.9)    | (9.9)  | 27               | 13   | 16   | (4.5)     | (5.0) |
| Exhaustion                     | Presence | 19               | 15   | 18               | 18   | 47.6      | 47.7   | 12               | 18   | 23   | 27.8      | 29.0  |
|                                | Mod/Sev  | 9                | 0    | 7                | 5    | (11.4)    | (11.6) | 0                | 8    | 7    | (4.6)     | (5.0) |
| Lack of Appetite               | Presence | 10               | 7    | 8                | 9    | 47.7      | 47.2   | 5                | 9    | 13   | 27.8      | 29.3  |
|                                | Mod/Sev  | 8                | 0    | 0                | 10   | (11.6)    | (10.1) | 0                | 17   | 0    | (4.6)     | (5.0) |
| Gloomy Thoughts                | Presence | 10               | 6    | 8                | 8    | 47.6      | 48.4   | 5                | 10   | 10   | 27.8      | 29.5  |
|                                | Mod/Sev  | 8                | 0    | 14               | 0    | (11.5)    | (11.1) | 0                | 0    | 17   | (4.6)     | (5.1) |
| Inner Tension                  | Presence | 11               | 7    | 8                | 10   | 47.6      | 48.1   | 7                | 9    | 13   | 27.8      | 29.7  |
|                                | Mod/Sev  | 15               | 20   | 29               | 9    | (11.3)    | (12.5) | 0                | 0    | 38   | (4.6)     | (5.3) |
| Reduced Ability to Concentrate | Presence | 12               | 8    | 8                | 12   | 47.6      | 48.1   | 10               | 10   | 12   | 27.9      | 28.3  |
|                                | Mod/Sev  | 7                | 0    | 14               | 1    | (11.7)    | (9.4)  | 0                | 0    | 14   | (4.7)     | (4.2) |
| Hot Flashes                    | Presence | 27               | 4    | 7                | 27   | 46.6      | 52.0   | 18               | 18   | 18   | 27.9      | 27.7  |
|                                | Mod/Sev  | 19               | 67   | 33               | 21   | (11.4)    | (10.5) | 9                | 38   | 18   | (4.6)     | (4.5) |
| Feeling Cold                   | Presence | 6                | 20   | 10               | 19   | 47.2      | 50.3   | 18               | 11   | 15   | 28.0      | 27.4  |
|                                | Mod/Sev  | 8                | 0    | 13               | 5    | (11.2)    | (12.3) | 18               | 0    | 0    | (4.6)     | (4.8) |

Values under “Sex (F/M)”, “Age (Young/Old)” and “BMI (Lean/OW/OB)” are the percent of participants who, at the Baseline visit, rated the symptom as being present (Presence = either mild, moderate or severe) and the percent of participants in whom the symptom was present at Baseline who rated it as being moderate or severe (Mod/Sev) (eg. 27% of 119 Females (n=32) had headache at baseline and 28% of those (n=9) rated it as being moderate or severe).

Values under “Age” and “BMI” headed “Mean (SD)” are the mean and SD age (yr) or BMI (kg/m<sup>2</sup>) of participants who, at Baseline, rated the symptom as being absent (None) or present (Any of either mild, moderate or severe).

Sex, F=female, M=Male; Age, Young = <48 yr, Old = ≥48 yr; BMI, Lean = BMI<25 kg/m<sup>2</sup>, OW = overweight (BMI 25 to 29.99 kg/m<sup>2</sup> inclusive), OB = obese (BMI ≥30 kg/m<sup>2</sup>). Under each of these column headings the number of participants is shown in brackets.

<sup>1</sup> Shaded values differ significantly by chi-squared test (p<0.05, p<0.01).

<sup>2</sup> Shaded values differ significantly by chi-squared test or 2-tailed t-test (p<0.05, p<0.01).

<sup>3</sup> Shaded values differ significantly by chi-squared test (p<0.05).

Table S5: Severity of symptoms when compared to severity at the Baseline visit.

|                                |         | Week 2 |      |                | Week 4 |      |                | Mean Weeks 2&4 |      |                |
|--------------------------------|---------|--------|------|----------------|--------|------|----------------|----------------|------|----------------|
|                                |         | More   | Less | p <sup>1</sup> | More   | Less | p <sup>1</sup> | More           | Less | p <sup>1</sup> |
| Headache                       | Test    | 11     | 11   | 0.077          | 10     | 13   | 0.16           | 19             | 13   | 0.20           |
|                                | Control | 17     | 6*   |                | 13     | 8    |                | 21             | 12   |                |
| Fatigue                        | Test    | 6      | 11   | 0.14           | 5      | 19*  | 0.021          | 9              | 18   | 0.057          |
|                                | Control | 9      | 7    |                | 12     | 9    |                | 17             | 13   |                |
| Limb/Joint Pain                | Test    | 5      | 4    | 0.32           | 7      | 5    | 0.28           | 10             | 7    | 0.26           |
|                                | Control | 9      | 7    |                | 9      | 4    |                | 13             | 9    |                |
| Anxiety                        | Test    | 1      | 6    | 0.11           | 2      | 9*   | 0.27           | 2              | 9*   | 0.11           |
|                                | Control | 8      | 8    |                | 4      | 8    |                | 9              | 12   |                |
| Lack of Energy                 | Test    | 7      | 11   | 0.27           | 6      | 13   | 0.28           | 11             | 15   | 0.22           |
|                                | Control | 7      | 12   |                | 5      | 13   |                | 11             | 16   |                |
| Exhaustion                     | Test    | 4      | 13*  | 0.23           | 4      | 7    | 0.32           | 7              | 14   | 0.27           |
|                                | Control | 5      | 8    |                | 3      | 8    |                | 6              | 11   |                |
| Lack of Appetite               | Test    | 7      | 3    | 0.32           | 10     | 4    | 0.34           | 14             | 4*   | 0.29           |
|                                | Control | 12     | 3*   |                | 6      | 3    |                | 14             | 5*   |                |
| Gloomy Thoughts                | Test    | 0      | 2    | 0.13           | 2      | 3    | 0.32           | 2              | 4    | 0.13           |
|                                | Control | 2      | 3    |                | 4      | 2    |                | 8              | 3    |                |
| Inner Tension                  | Test    | 3      | 7    | 0.36           | 4      | 6    | 0.42           | 6              | 7    | 0.35           |
|                                | Control | 2      | 2    |                | 2      | 2    |                | 3              | 2    |                |
| Reduced Ability to Concentrate | Test    | 3      | 3    | 0.34           | 2      | 3    | 0.40           | 4              | 4    | 0.33           |
|                                | Control | 3      | 6    |                | 5      | 6    |                | 5              | 7    |                |
| Hot Flashes                    | Test    | 4      | 7    | 0.16           | 2      | 10*  | 0.098          | 5              | 10   | 0.13           |
|                                | Control | 8      | 5    |                | 5      | 5    |                | 9              | 7    |                |
| Feeling Cold                   | Test    | 5      | 7    | 0.28           | 1      | 9*   | 0.070          | 4              | 10   | 0.19           |
|                                | Control | 4      | 9    |                | 6      | 7    |                | 8              | 11   |                |

Values are the % of participants in whom the symptom was more severe or less severe than the severity at the Baseline visit out of n=96 on Test and n=95 on Control.

\* Ratio of M:L significantly different from 1:1 (p<0.05 by binomial distribution) where M and L are the number of participants in whom the symptom was more severe (M) or less severe (L).

<sup>1</sup> P-values are the significance of the difference between the ratio of M:L on Test vs Control by Fisher's exact test). Light orange shading shows differences with p<0.10, and yellow shading shows differences with p<0.05.
